# Supplementary material for: Enhanced mucosal SARS-CoV-2 immunity after heterologous intramuscular mRNA prime/intranasal protein boost vaccination with a combination adjuvant
Source: PubMed Central journal article supplement — Mol Ther. 2024 Oct 28;32(12):4448–66. doi: 10.1016/j.ymthe.2024.10.016 (PMC11638833; doi:10.1016/j.ymthe.2024.10.016), 2024-10-28
Supplement: mmc1.pdf [file mmc1.pdf]

## **Supplemental Information**

**Enhanced mucosal SARS-CoV-2 immunity after  
heterologous intramuscular mRNA prime/intranasal  
protein boost vaccination with a combination adjuvant**

**Gabriel Laghlali, Matthew J. Wiest, Dilara Karadag, Prajakta Warang, Jessica J. O'Konek, Lauren A. Chang, Seok-Chan Park, Vivian Yan, Mohammad Farazuddin, Katarzyna W. Janczak, Adolfo García-Sastre, James R. Baker Jr., Pamela T. Wong, and Michael Schotsaert**

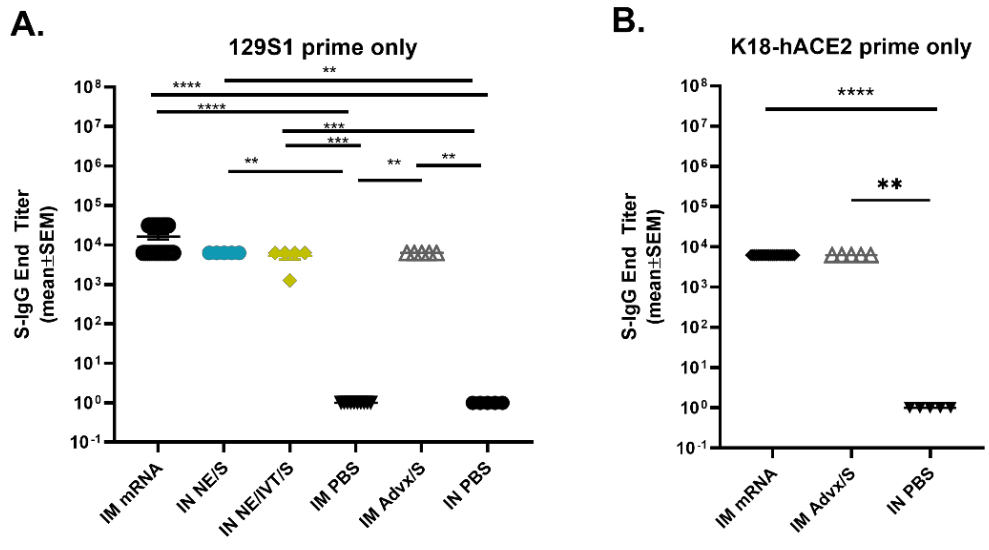

**Figure S1:** S-specific IgG induced 2 wks post-prime immunization in (A) 129S1 and (B) K18hACE2 mice immunized IM with 0.4 $\mu$ g of BNT162b2 mRNA or Advx with 15  $\mu$ g S, or IN with 15  $\mu$ g S with either NE or NE/IVT or PBS (n=5/grp; \* $p$ <0.05, \*\* $p$ <0.01, \*\*\* $p$ <0.001, \*\*\*\* $p$ <0.0001 by Mann-Whitney U test).

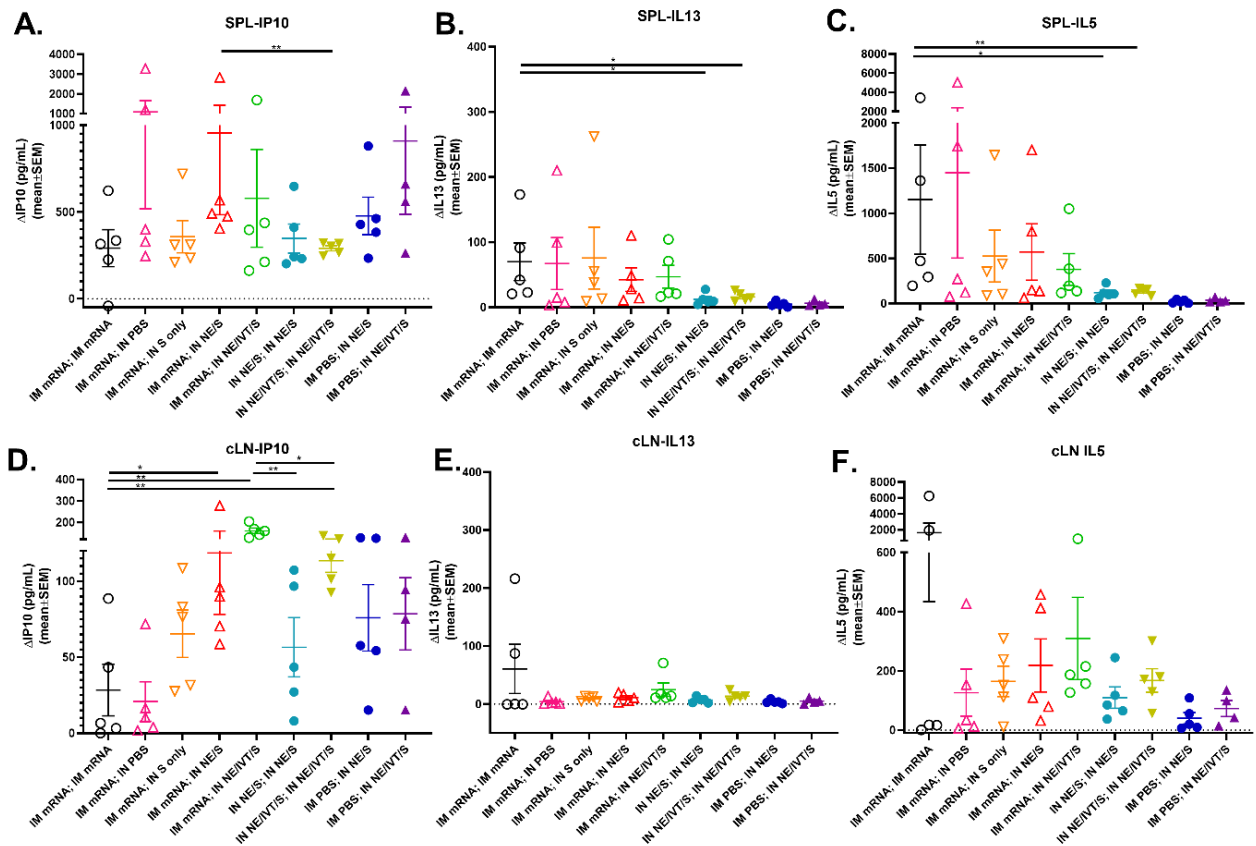

**Figure S2:** Antigen recall responses assessed in splenocytes and cervical lymph node of twice IN administered mice have suppressed Th2 responses. Splenocytes (A-C) and cLN cellular isolates (D-F) were prepared from mice given prime/boost immunizations with the indicated adjuvant/antigen regimens two weeks after the final immunization. Cells were stimulated *ex vivo* with 25  $\mu\text{g}/\text{mL}$  S protein for 72h, and levels of secreted (A, D) IP-10 (B, E) IL-13, and (C, F) IL-5 were measured by multiplex immunoassay. Values were assessed relative to unstimulated cells. (n=4-5/grp; \* $p < 0.05$ , \*\* $p < 0.01$  by Mann-Whitney U test shown only for select groups-(full statistical analysis is shown in **Table S1**)).

## Class I Tetramer Gating Pathway

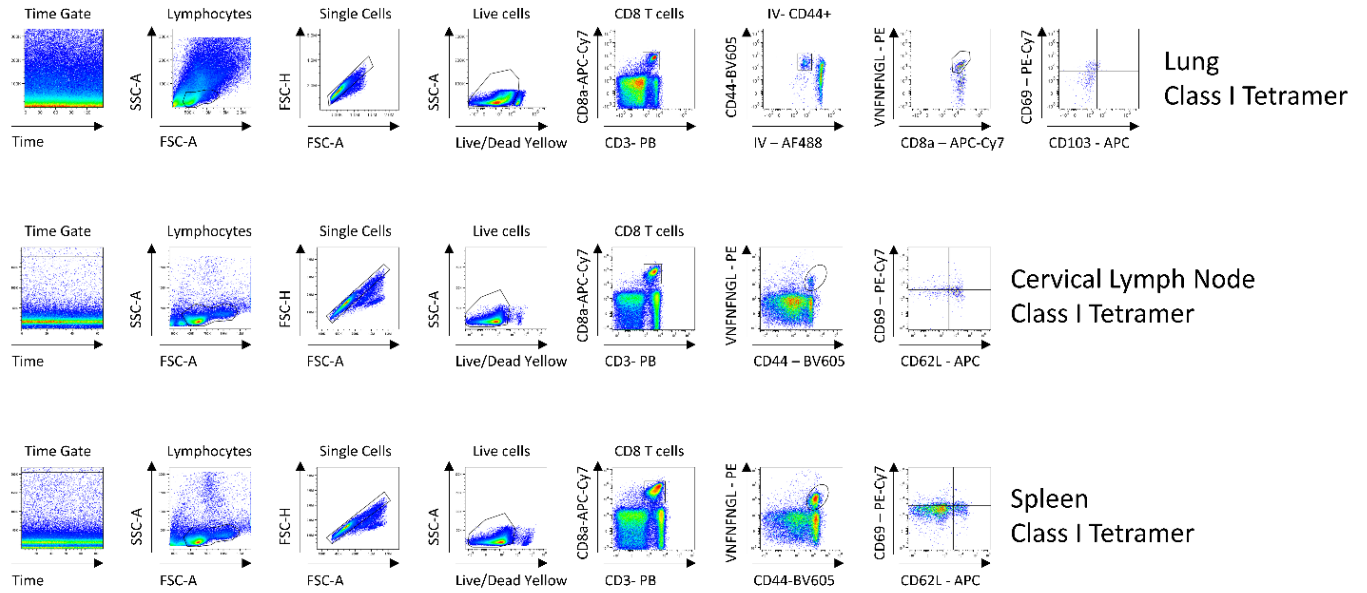

## Class II Tetramer Gating Pathway

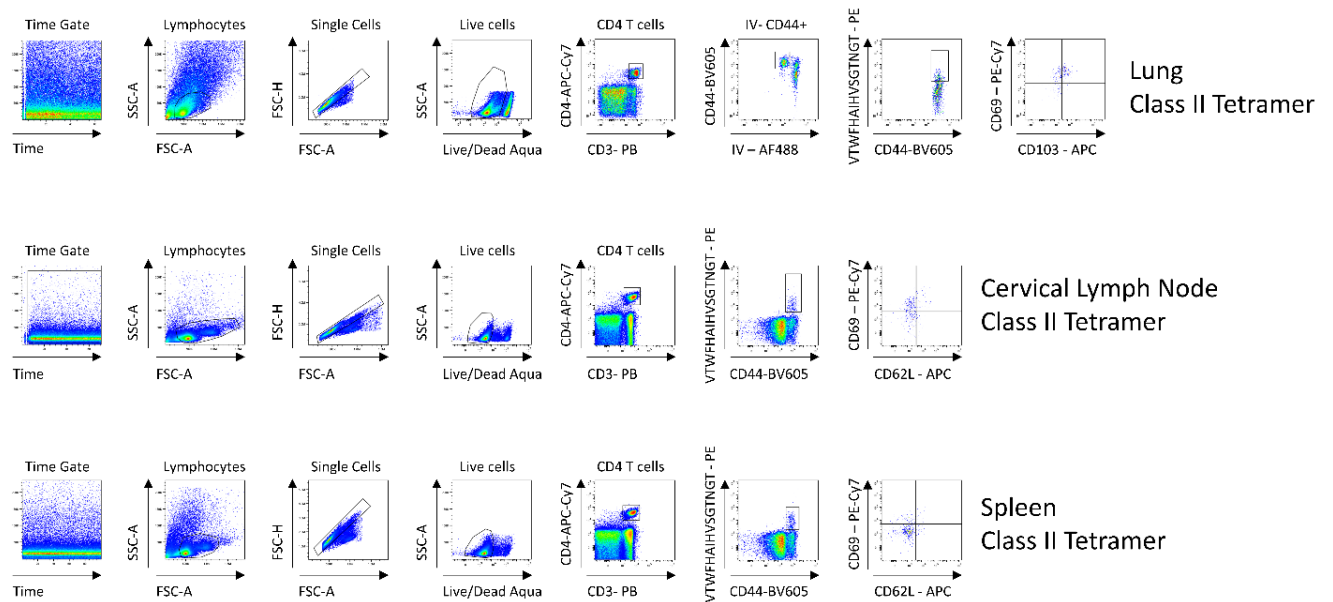

**Figure S3:** Gating strategy for Class I and Class II Tetramer staining. Representative gating strategy for tissue resident memory CD8<sup>+</sup> and CD4<sup>+</sup> T cells in lung were distinguished by IV<sup>-</sup>CD44<sup>+</sup>Tetramer<sup>+</sup>CD69<sup>+</sup>CD103<sup>+</sup> expression. Frequency of CD44<sup>+</sup>Tetramer<sup>+</sup>CD69<sup>+</sup>CD62L<sup>-</sup> expressing CD8<sup>+</sup> and CD4<sup>+</sup> T cells were also assessed in the cLN and spleen.

## Spleen/cLN ICS Gating Pathway

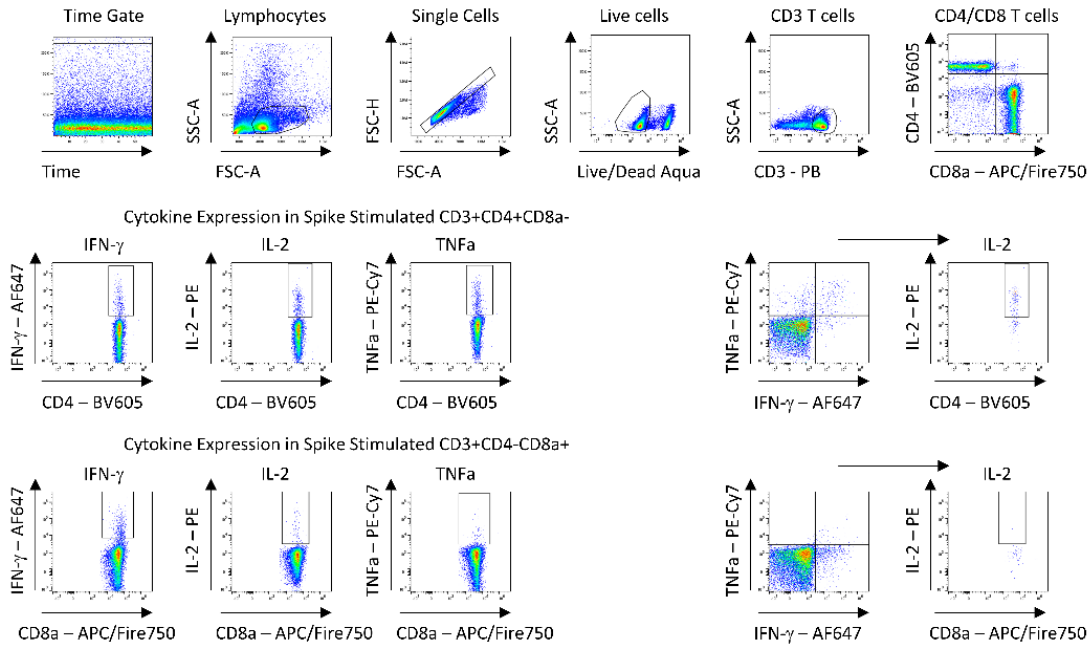

## Lung ICS Gating Pathway

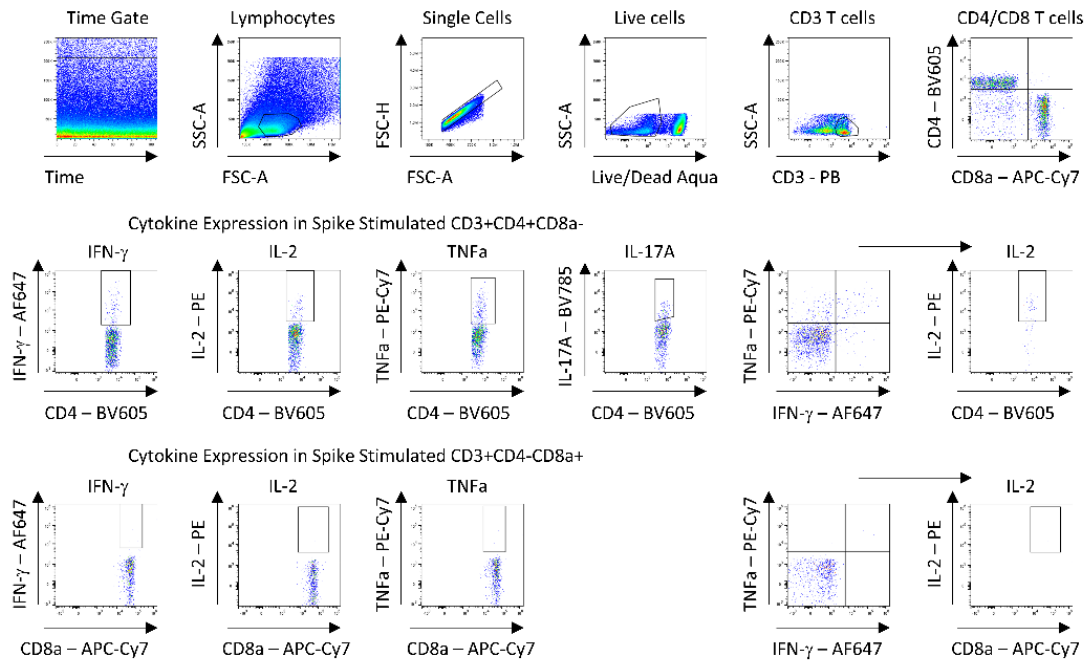

**Figure S4:** Gating strategy for ICS. Representative gating strategy for cytokine (IFN- $\gamma$ , IL-2, TNF $\alpha$ , IL-17A) expression in CD4<sup>+</sup> T and CD8<sup>+</sup> T cells was evaluated in the spleen and cLN, and lung after 24 hours of stimulation with 25 $\mu$ g/mL spike protein in the presence of Brefeldin A for the last 6 hours.

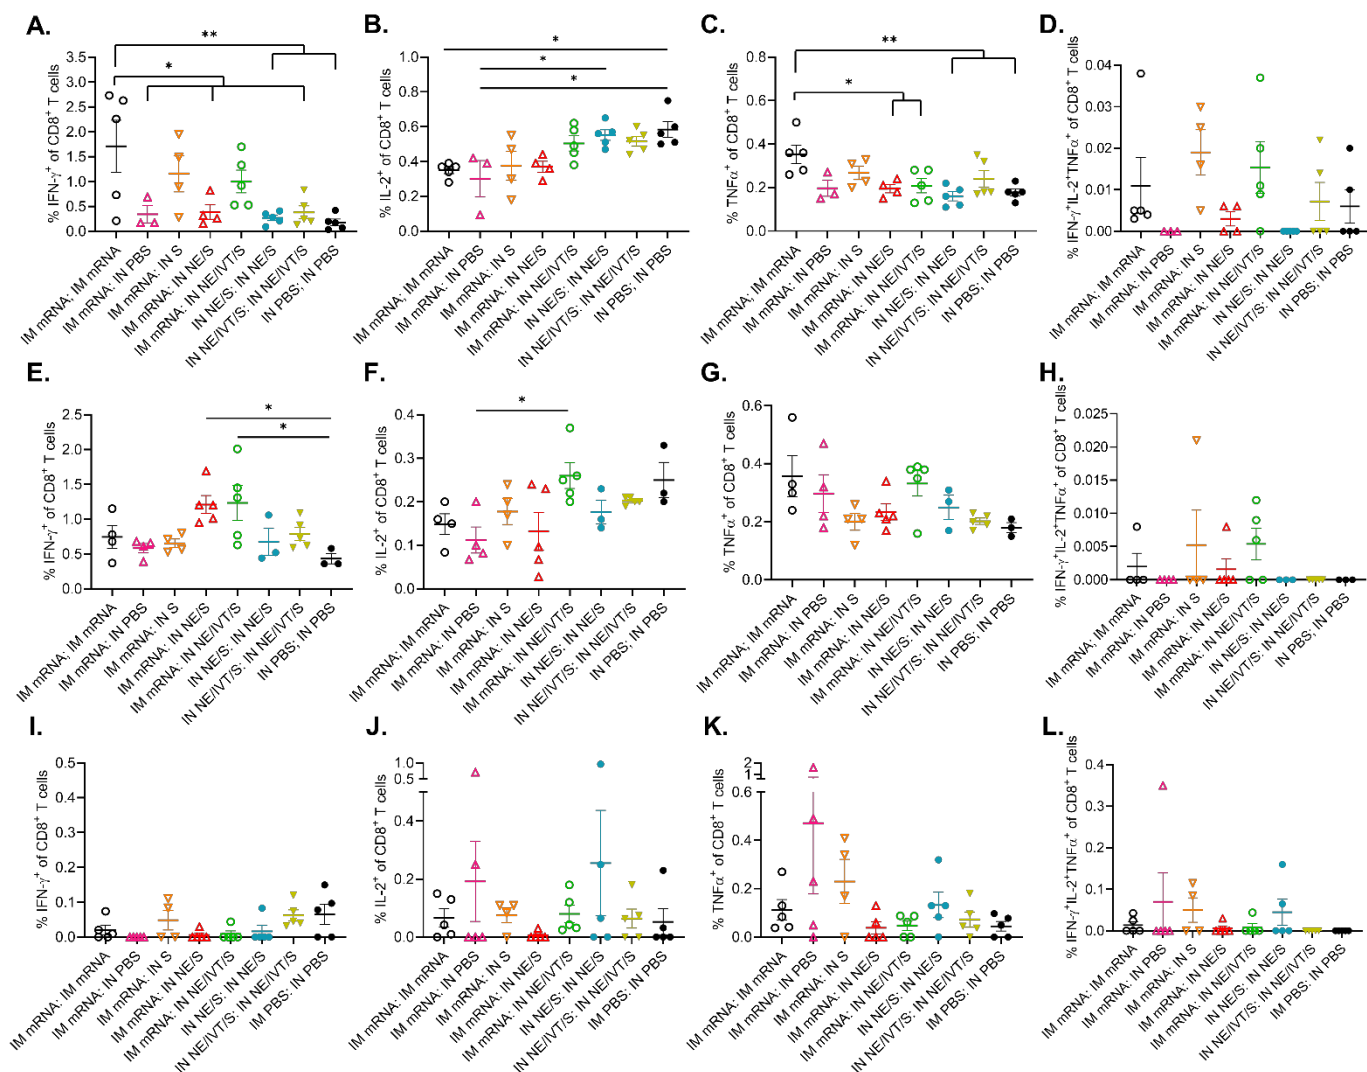

**Figure S5:** Cytokine expression in CD8<sup>+</sup> T cells isolated from spleen, cLN, and lung. Frequency of IFN-γ, IL-2, TNFα, and IFN-γ IL-2 TNFα expressing CD8 T cells in cell suspensions isolated from the spleen (A-D), cervical lymph nodes (E-H), and lungs (I-L) of vaccinated mice after 24 hours of stimulation with 25μg/mL spike protein. (n=3-5/grp; \**p*<0.05, \*\**p*<0.01, by One way ANOVA with Tukey post-hoc).

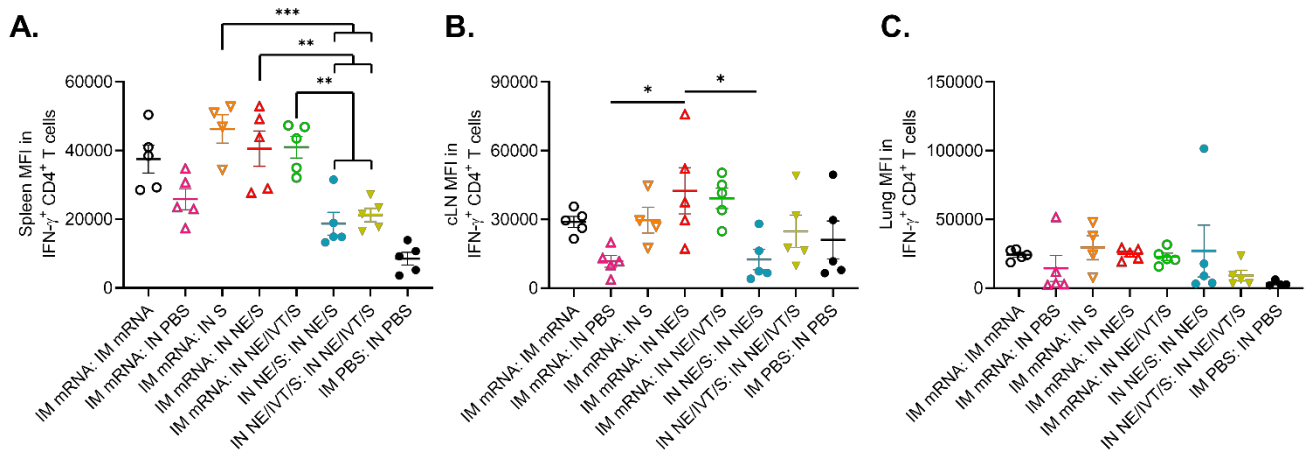

**Figure S6:** MFI of IFN- $\gamma$  expressing CD4<sup>+</sup> T cells. Mean fluorescent intensity of IFN- $\gamma$  expression in CD4<sup>+</sup> T cells in spleen (A), cLN (B) and lung (C) cells stimulated with 25 $\mu$ g/mL spike protein for 24 hours. (n=4-5/grp; \* $p < 0.05$ , \*\* $p < 0.01$ , \*\*\* $p < 0.001$  by One way ANOVA with Tukey post-hoc test shown for select groups (full statistical analysis is shown in **Table S1**)).







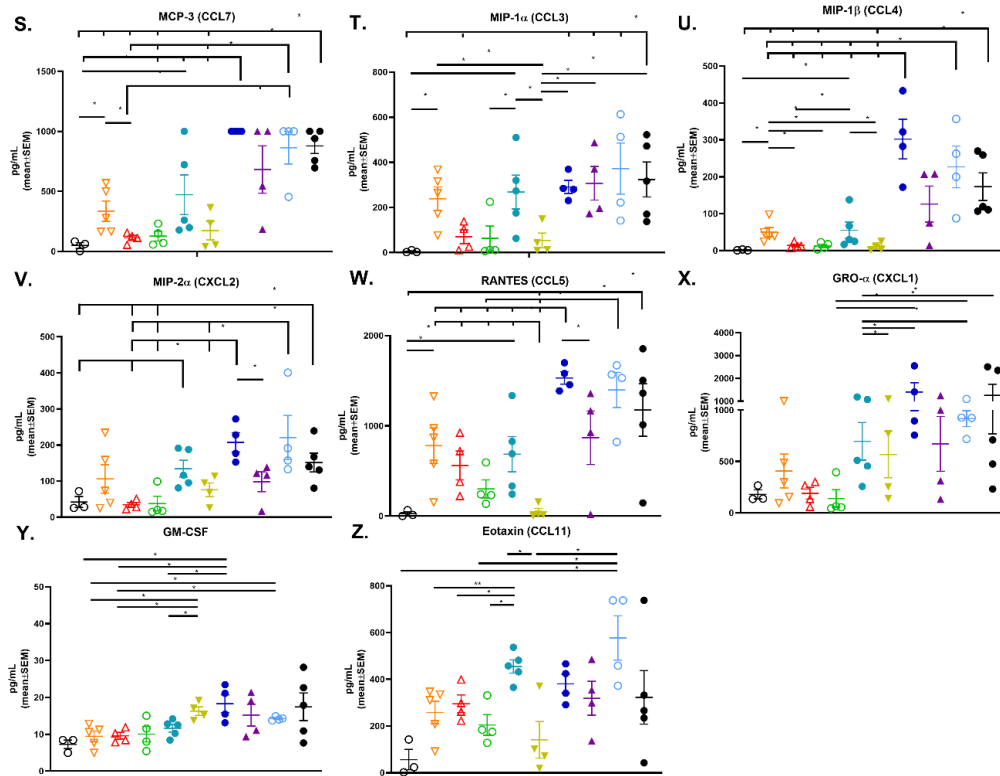

**Figure S8: Cytokine production in lung homogenates from 129S1 immunized mice post-challenge demonstrate different host response skewing depending on vaccination type and route.** Individual cytokine levels in lung homogenate (shown as heatmap in Figure 7) measured by multiplex immunoassay from immunized 129S1 mice in Figure 7 measured at 4 d.p.i. with  $10^4$  pfu B.1.351. (A) IFN- $\gamma$ , (B) IL-2, (C) TNF- $\alpha$ , (D) IL-12p70, (E) IP-10, (F) IL-4, (G) IL-5, (H) IL-13, (I) IL-6, (J) IL-17A, (K) IL-10, (L) IL-22, (M) IL-23, (N) IL-27, (O) IL-18, (P) IL-9, (Q) IL-1 $\beta$ , (R) MCP-1, (S) MCP-3, (T) MIP-1 $\alpha$ , (U) MIP-1 $\beta$ , (V) MIP-2 $\alpha$ , (W) RANTES, (X) GRO $\alpha$ , (Y) GM-CSF, (Z) eotaxin ( $n=4-5$ /grp; \* $p<0.05$ , \*\* $p<0.01$  by Mann-Whitney U test).

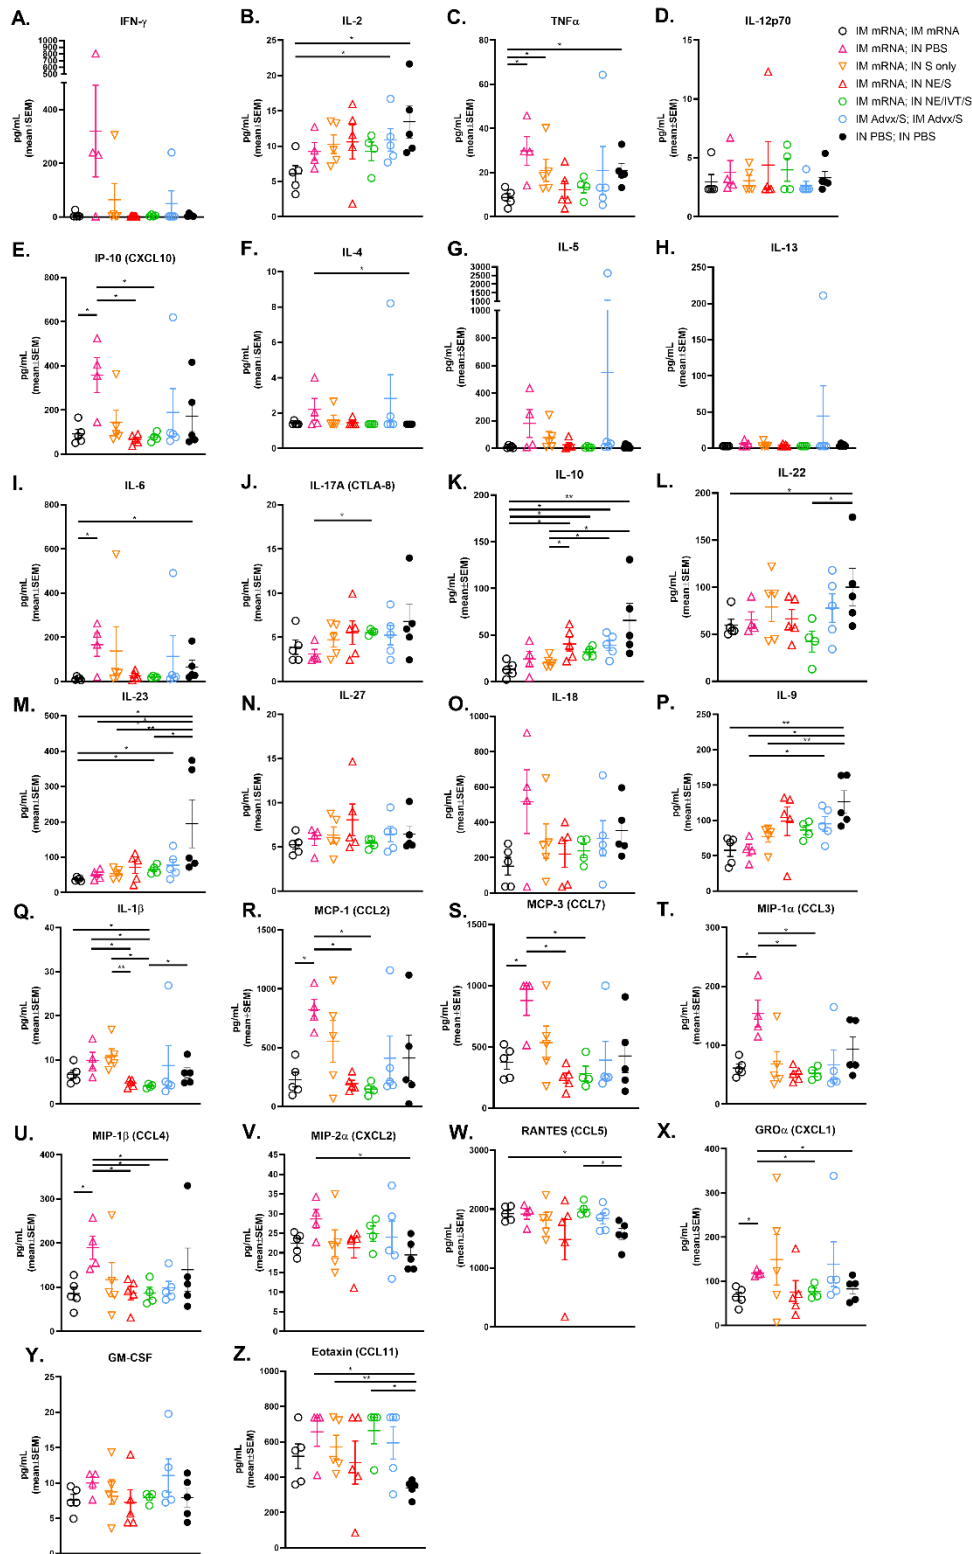

**Figure S9: Cytokine production in lung homogenates from K18-hACE2 immunized mice post-challenge demonstrate different host response skewing depending on vaccination type and route. Individual cytokine levels in lung homogenate (shown as heatmap in Figure 7)**

measured by multiplex immunoassay from immunized K18-hACE2 mice in Figure 7 measured at 4 d.p.i. with  $10^4$  pfu BA.5. (A) IFN- $\gamma$ , (B) IL-2, (C) TNF- $\alpha$ , (D) IL-12p70, (E) IP-10, (F) IL-4, (G) IL-5, (H) IL-13, (I) IL-6, (J) IL-17A, (K) IL-10, (L) IL-22, (M) IL-23, (N) IL-27, (O) IL-18, (P) IL-9, (Q) IL-1 $\beta$ , (R) MCP-1, (S) MCP-3, (T) MIP-1 $\alpha$ , (U) MIP-1 $\beta$ , (V) MIP-2 $\alpha$ , (W) RANTES, (X) GRO $\alpha$ , (Y) GM-CSF, (Z) eotaxin ( $n=4-5$ /grp; \* $p<0.05$ , \*\* $p<0.01$  by Mann-Whitney U test).

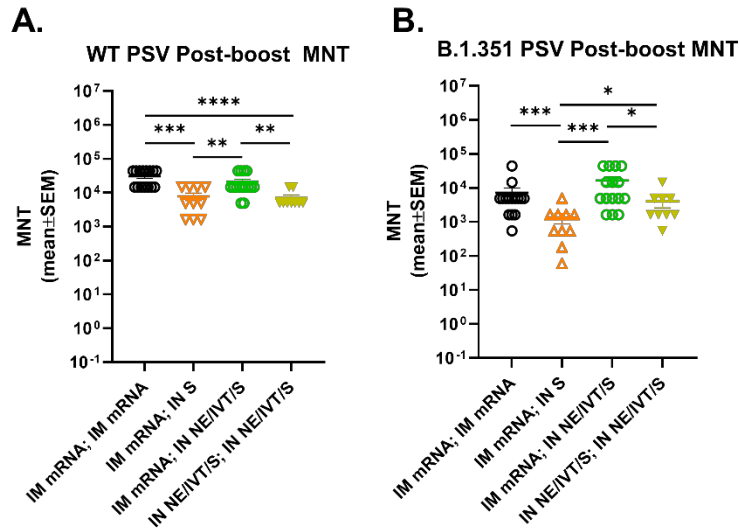

**Figure S10: Serum viral neutralizing antibody titers in immunized 129S1 donor mice used for passive serum transfer.** 129S1 mice were immunized with IM mRNA prime/boost, IN NE/IVT/S prime/boost or with IM mRNA prime followed by IN boost with S alone or adjuvanted with NE/IVT at a 4 wk interval. Vaccine doses consisted of 0.4 $\mu$ g of mRNA and 15  $\mu$ g S protein. Neutralizing antibody titers were measured against (A) WT and (B) B.1.351 pseudoviruses. 2wks post-boost, sera were pooled from each treatment group for use in passive transfer experiments ( $n=9-15$ /grp; \* $p<0.05$ , \*\* $p<0.01$ , \*\*\* $p<0.001$ , \*\*\*\* $p<0.0001$  by Mann-Whitney U test).

**TABLE S1:** Complete statistical data analysis in figures ( $*p < 0.05$ ,  $**p < 0.01$ ,  $***p < 0.001$ ,  $****p < 0.0001$  by Mann-Whitney U test or one way ANOVA with Tukey post-hoc test).

**Table S2. Antibodies utilized in flow cytometry.**

| <b>Antibody</b>                | <b>Clone</b> | <b>Source</b>     | <b>Catalog</b> |
|--------------------------------|--------------|-------------------|----------------|
| Pacific Blue Anti-Mouse CD3    | 17A2         | Biologend         | 100214         |
| BV605 Anti-Mouse CD4           | RM4-5        | Biologend         | 100548         |
| APC-Cy7 Anti-Mouse CD4         | RM4-5        | Biologend         | 100526         |
| APC-Cy7 Anti-Mouse CD8a        | 53-6.7       | Biologend         | 100714         |
| APC-Fire750 Anti-Mouse CD8a    | 53-6.7       | Biologend         | 100766         |
| BV605 Anti-Mouse CD44          | IM7          | Biologend         | 103047         |
| APC Anti-Mouse CD62L           | MEL-14       | Biologend         | 104412         |
| PE-Cy7 Anti-Mouse CD69         | H1.2F3       | eBioscience       | 25-0691-82     |
| APC Anti-Mouse CD103           | 2E7          | Biologend         | 121414         |
| AF647 Anti-Mouse IFN- $\gamma$ | XMG1.2       | Biologend         | 505814         |
| PE Anti-Mouse IL-2             | JES6-5H4     | Biologend         | 503808         |
| PE-Cy7 Anti-Mouse TNF $\alpha$ | MP6-XT22     | Biologend         | 506324         |
| BV785 Anti-Mouse IL-17A        | TC11-18H10.1 | Biologend         | 506928         |
| PE-VNFnFNGL                    | N/A          | NIH Tetramer Core |                |
| PE-VTWFHAIHVSGTNGT             | N/A          | NIH Tetramer Core |                |
